# Supplementary material
Source: Research Square preprint supplement (doi:10.21203/rs.3.rs-9564821/v1)
Supplement: Supplementary file 1 [file 0dd5fdea9d6fe1e7885863a1.docx]

**Fig.1: NPW water sample at various dilutions tested for the manganese tolerating bacterial presence recognised as developed colonies.**

| 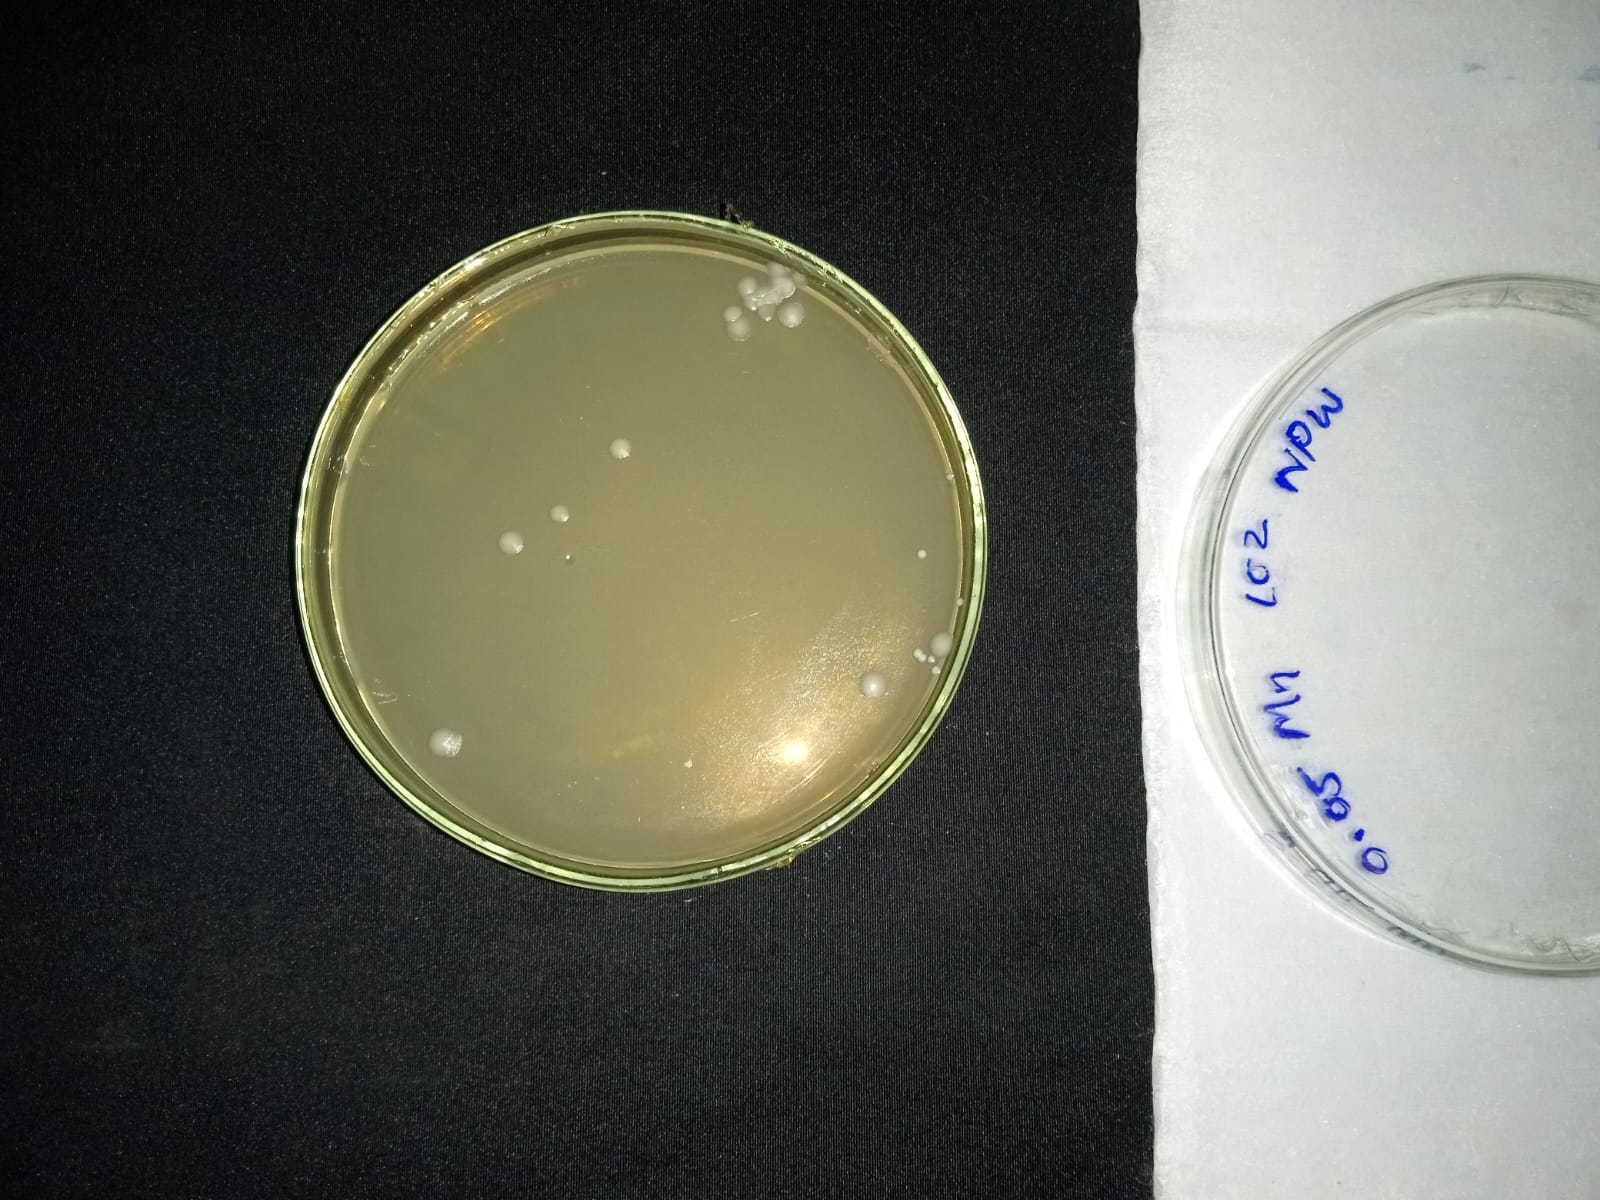 | 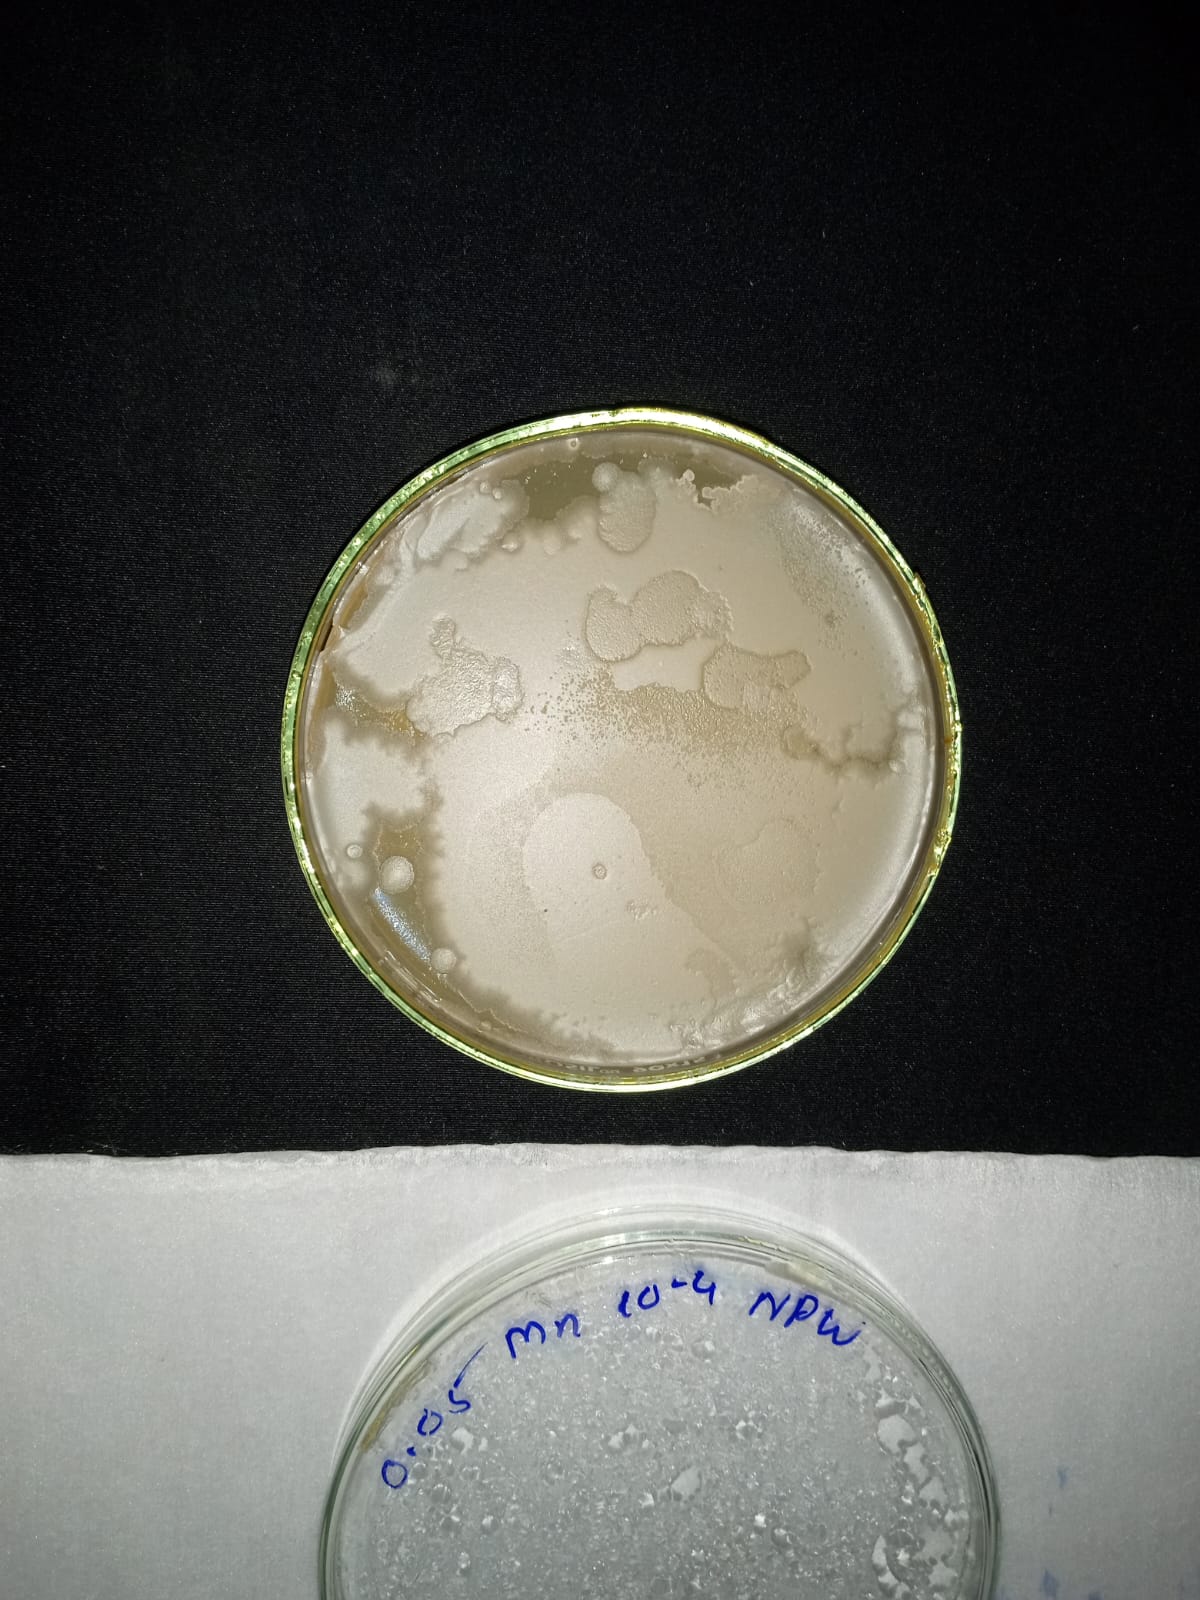 |
| --- | --- |
| **0.05 mM – NPW Dil. 10-2** | **0.05 mM – NPW Dil. 10-4** |
| **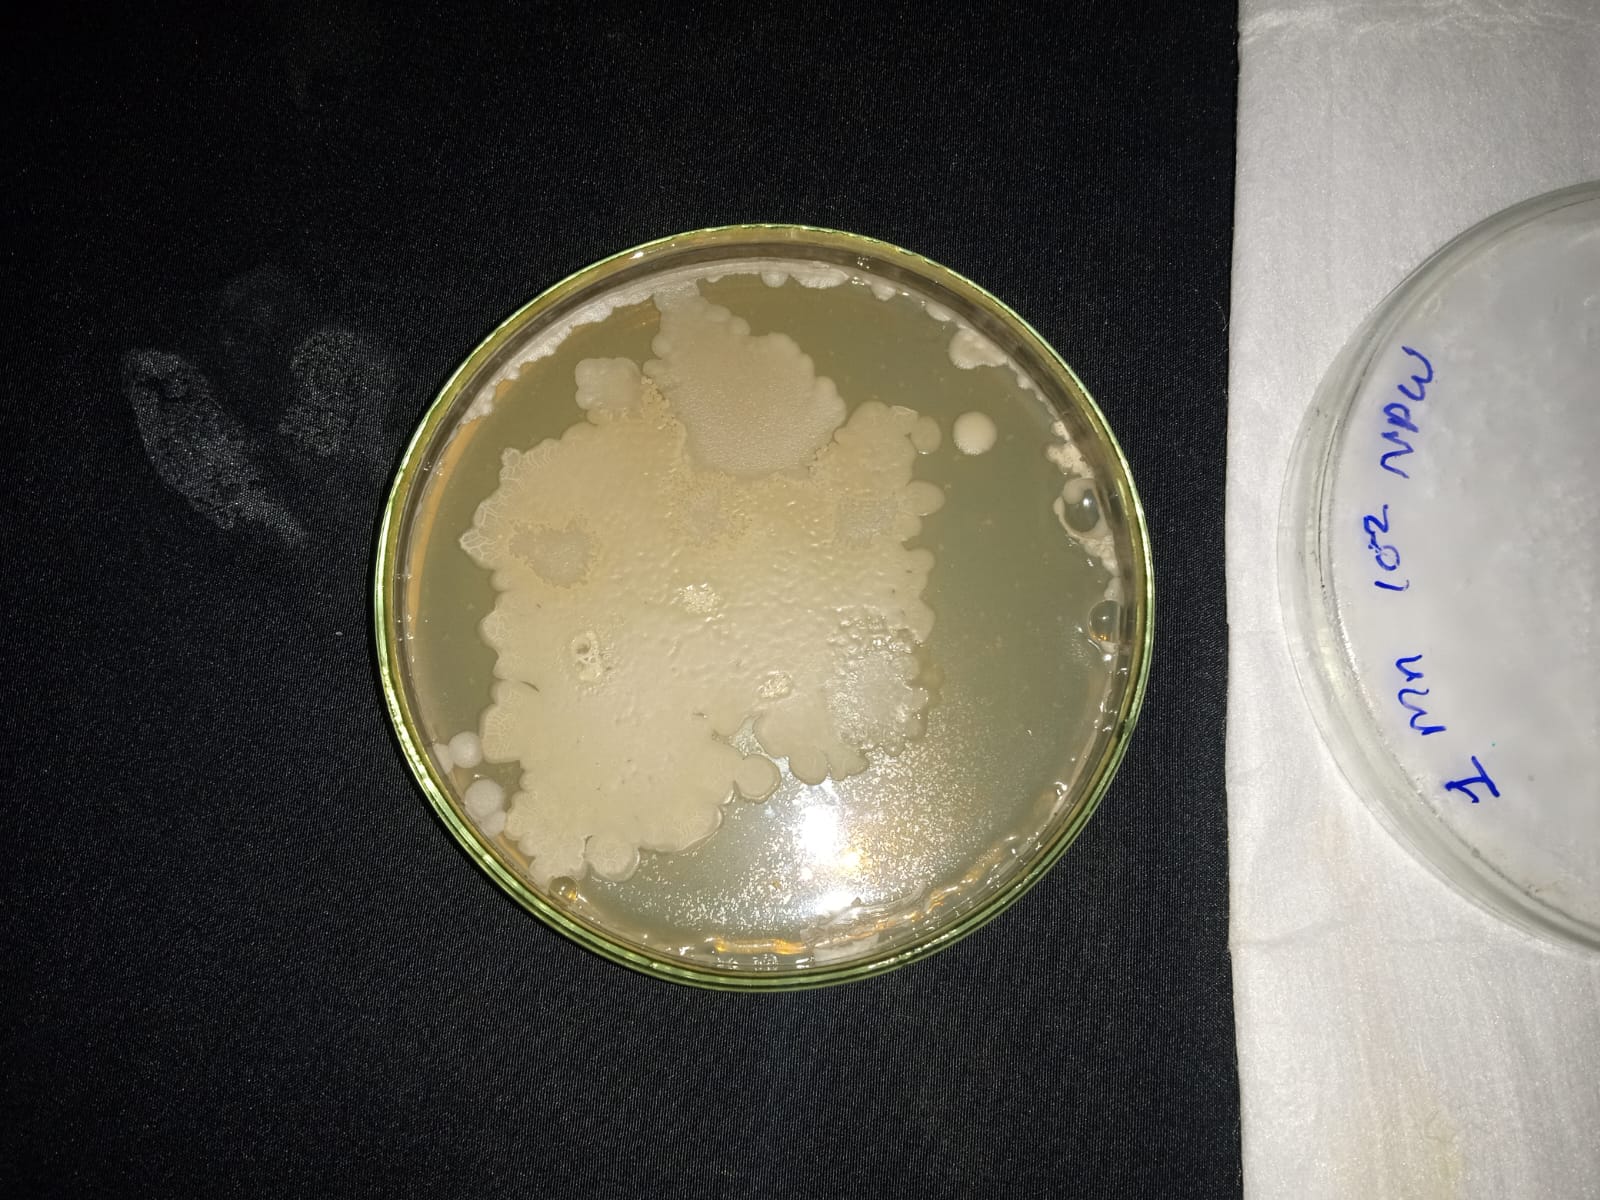** | **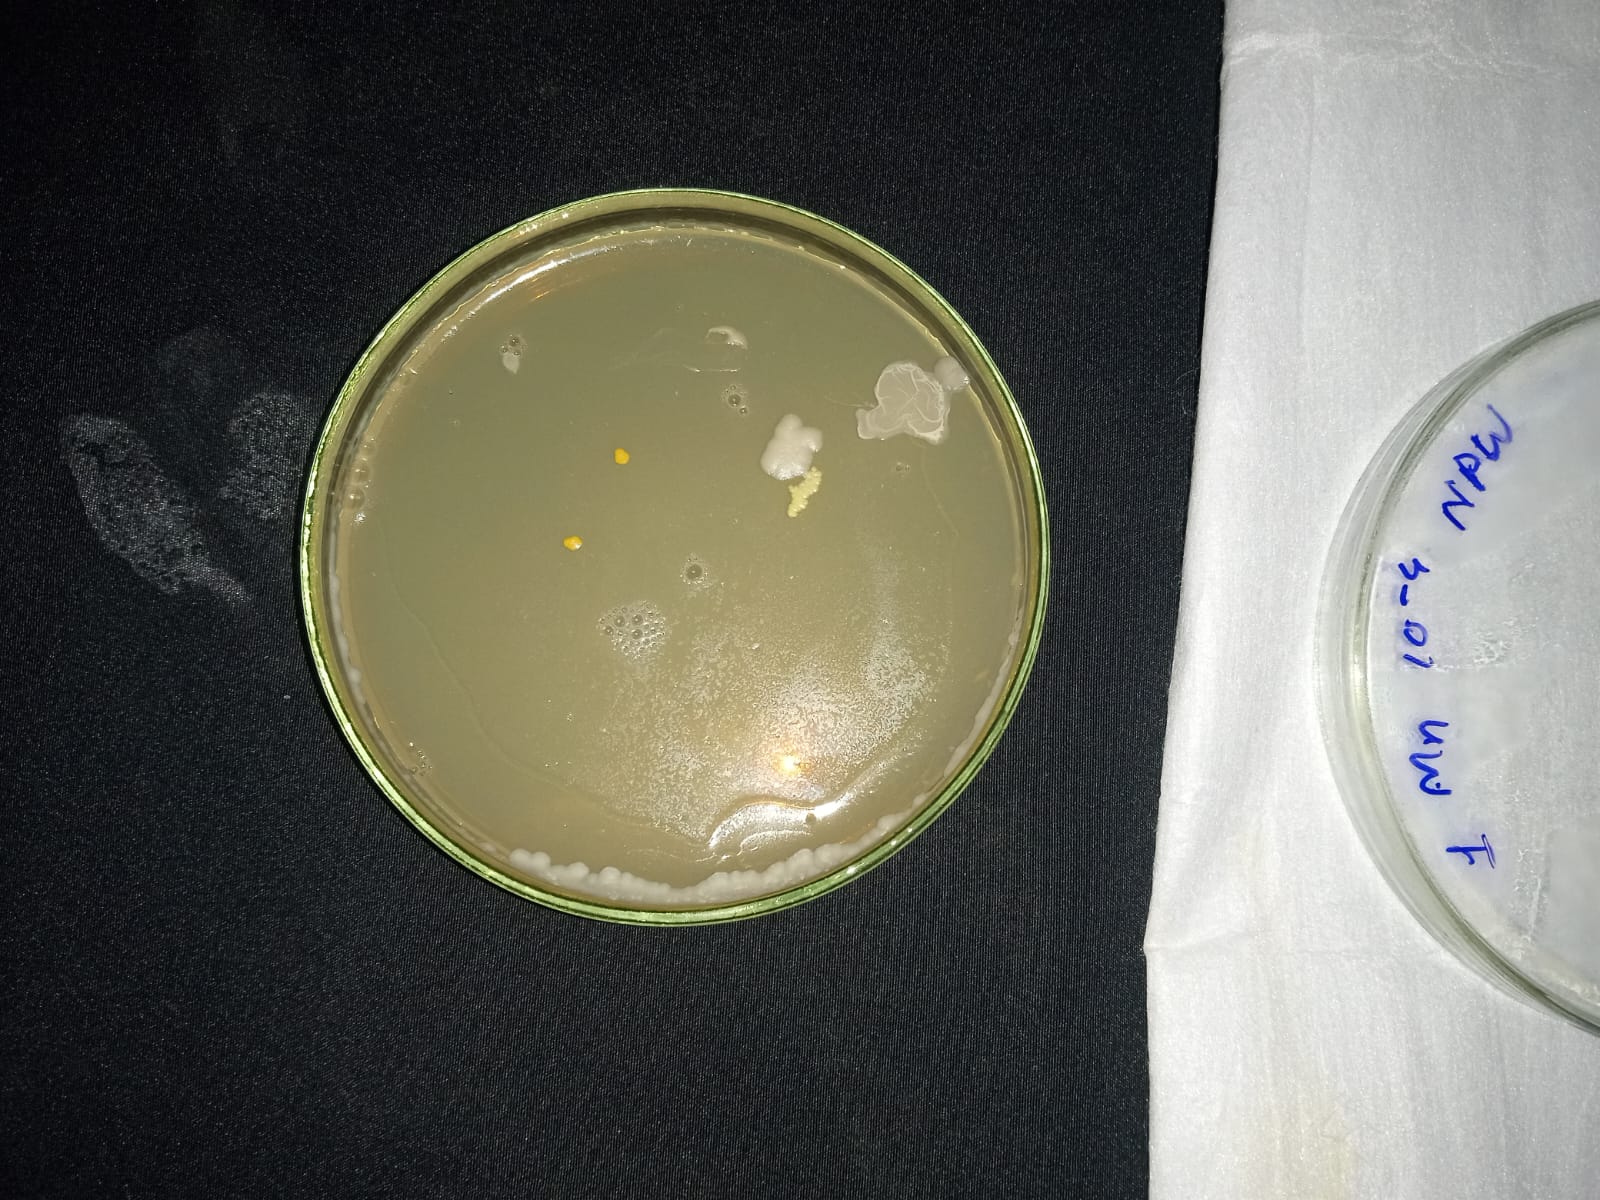** |
| **1 mM – NPW Dil. 10-2** | **1 mM – NPW Dil. 10-4** |
| **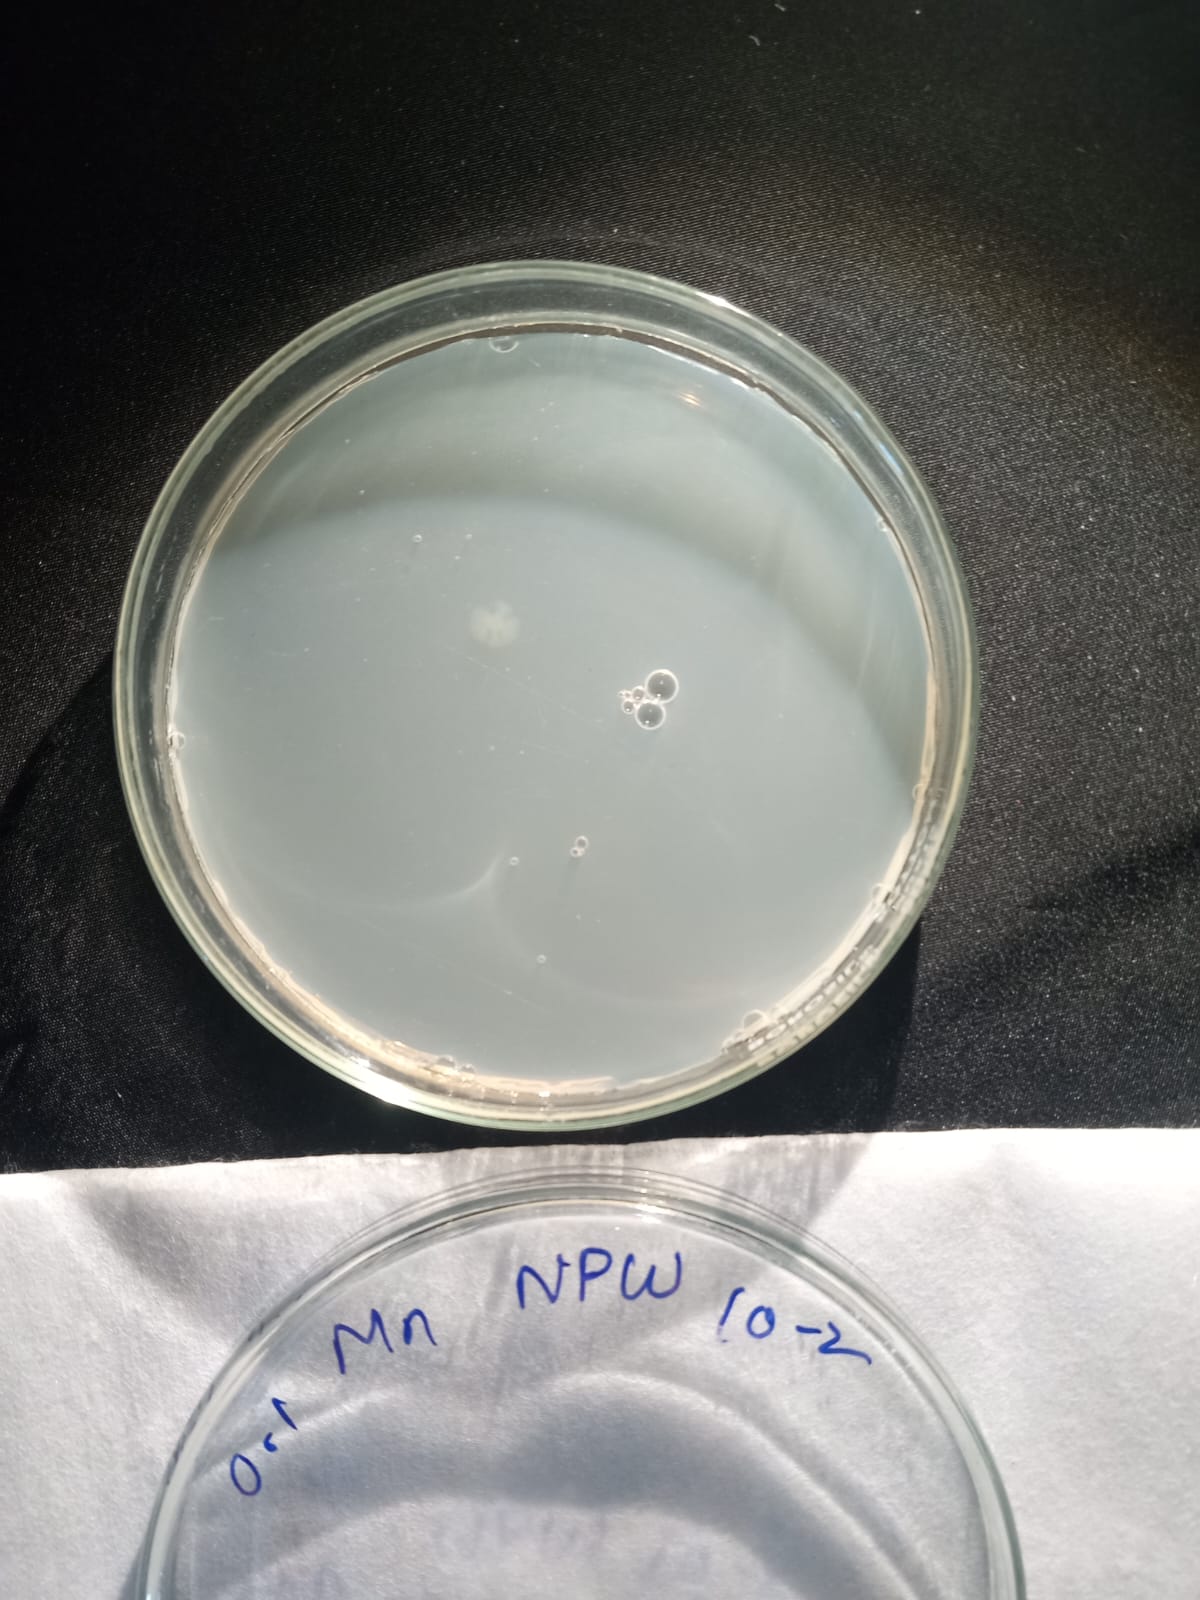** | **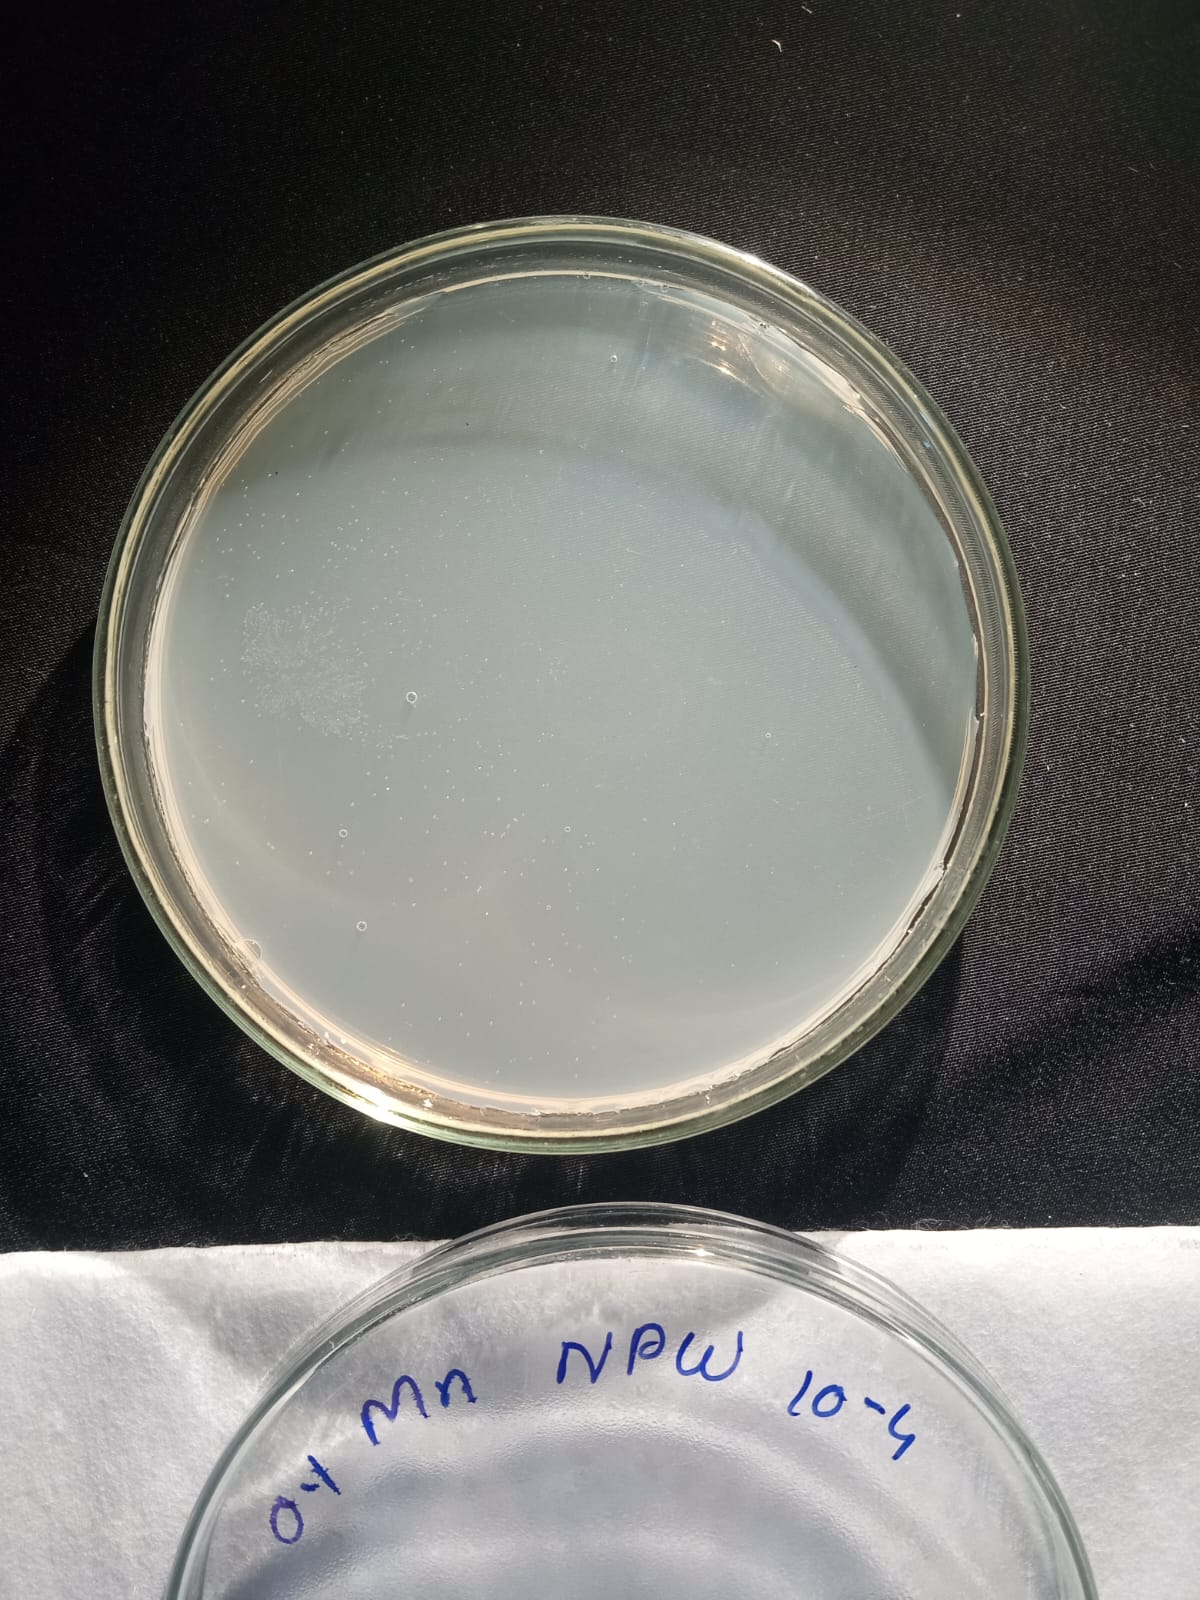** |
| **0.1 mM – NPW Dil. 10-2** | **0.1 mM – NPW Dil. 10-4** |
| **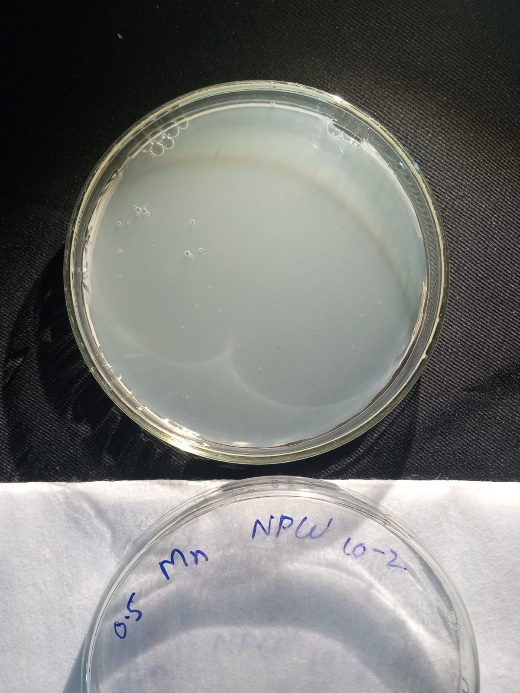** | **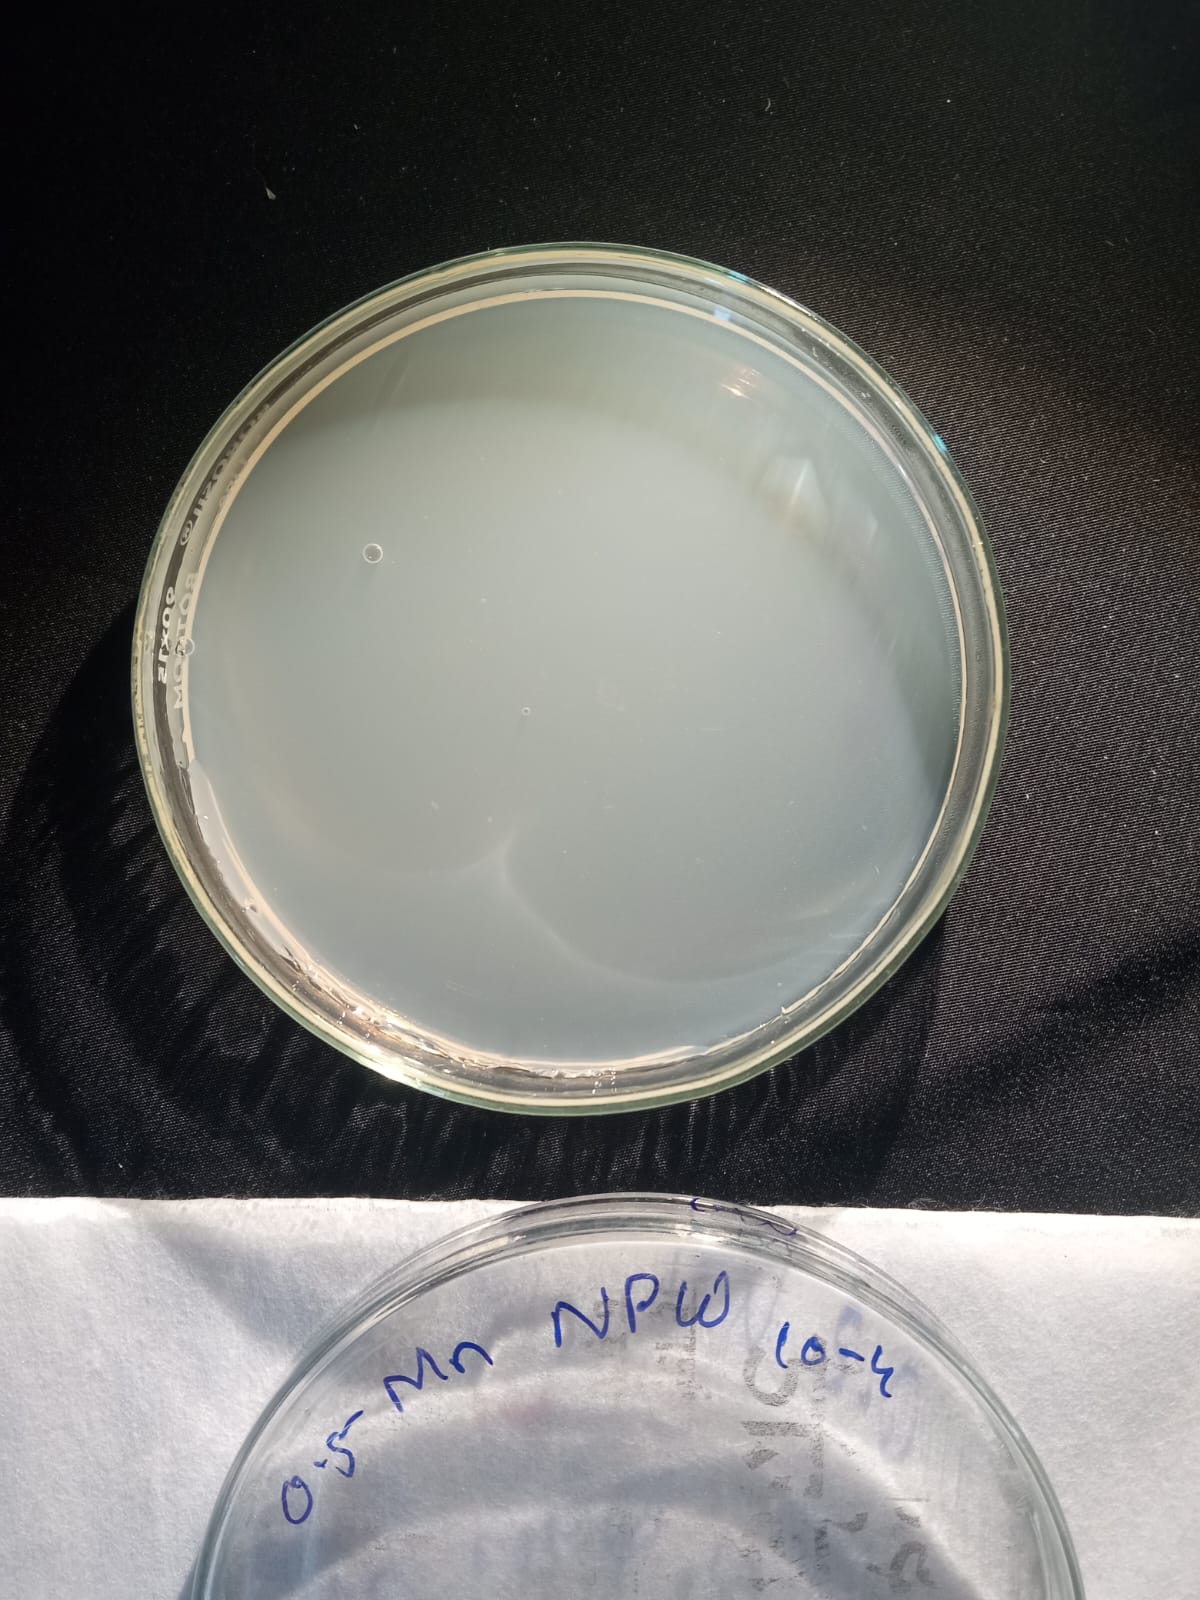** |
| **0.5 mM – NPW Dil. 10-2** | **0.5 mM – NPW Dil. 10-4** |
|  |  |

**Fig.2: DCW water sample at various dilutions tested for the manganese tolerating bacterial presence recognised as developed colonies.**

| **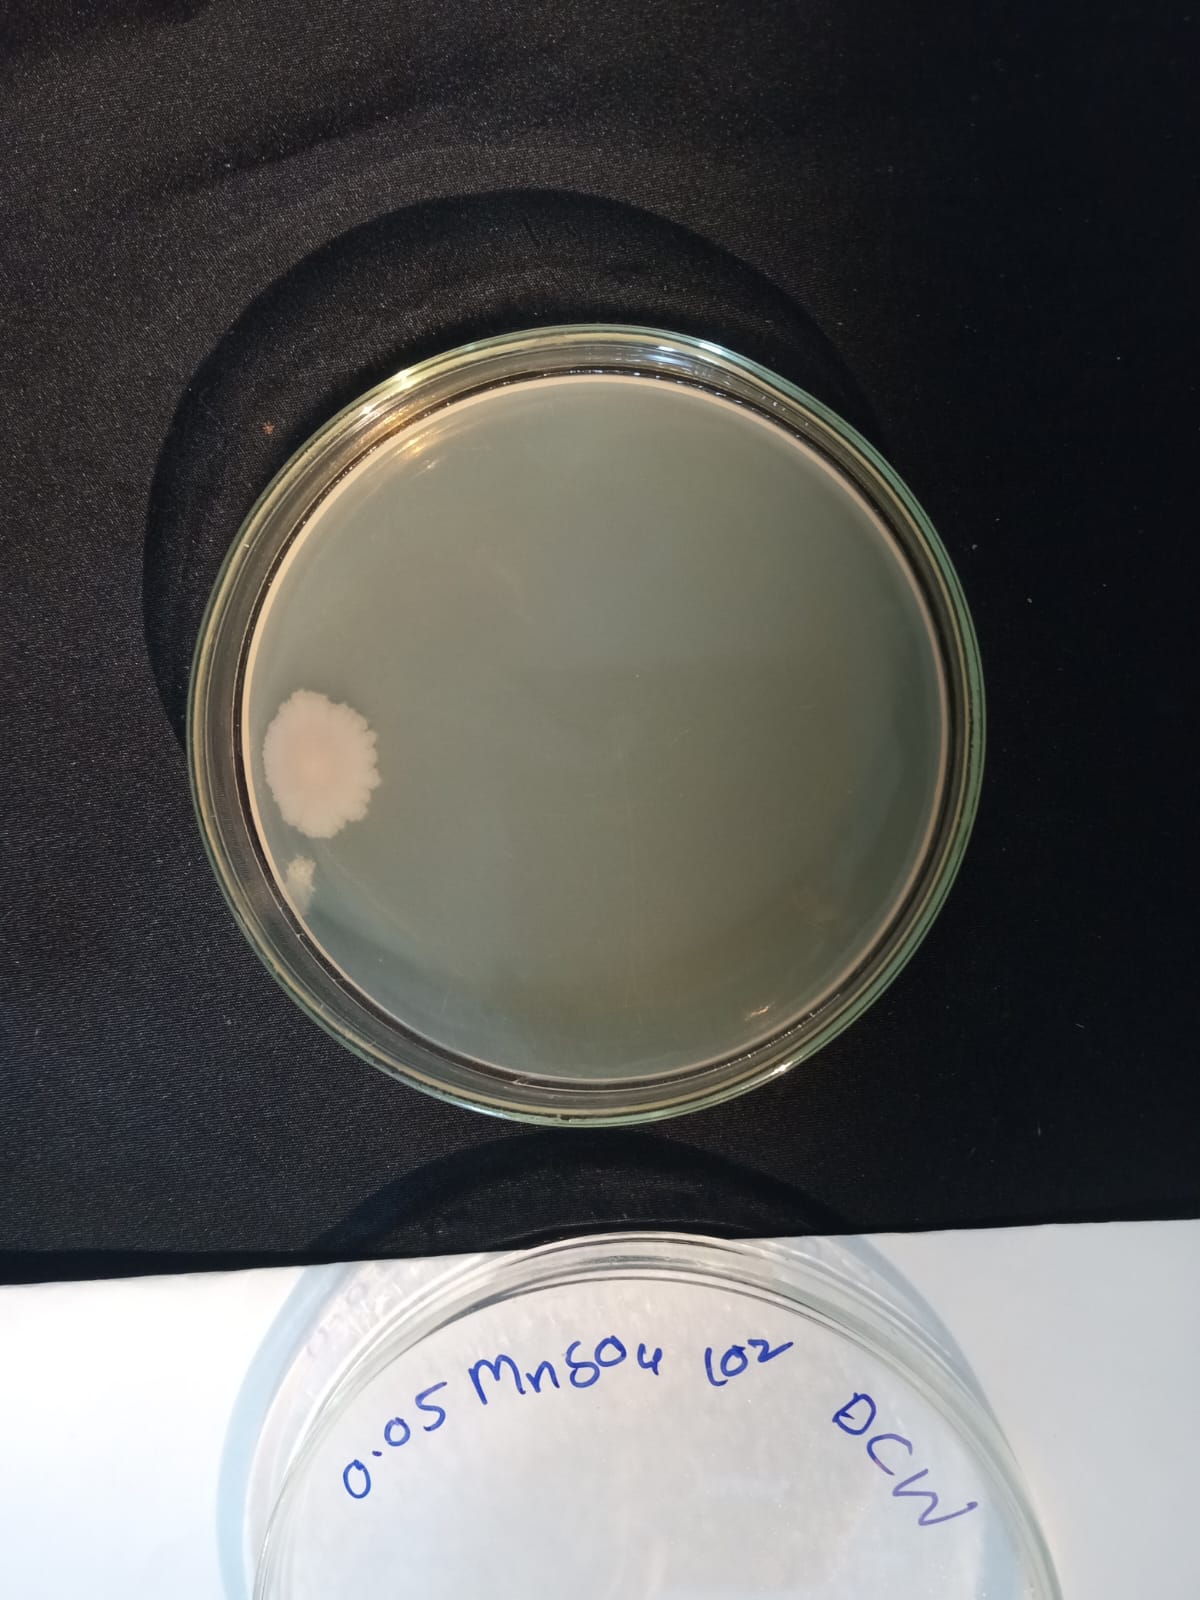** | **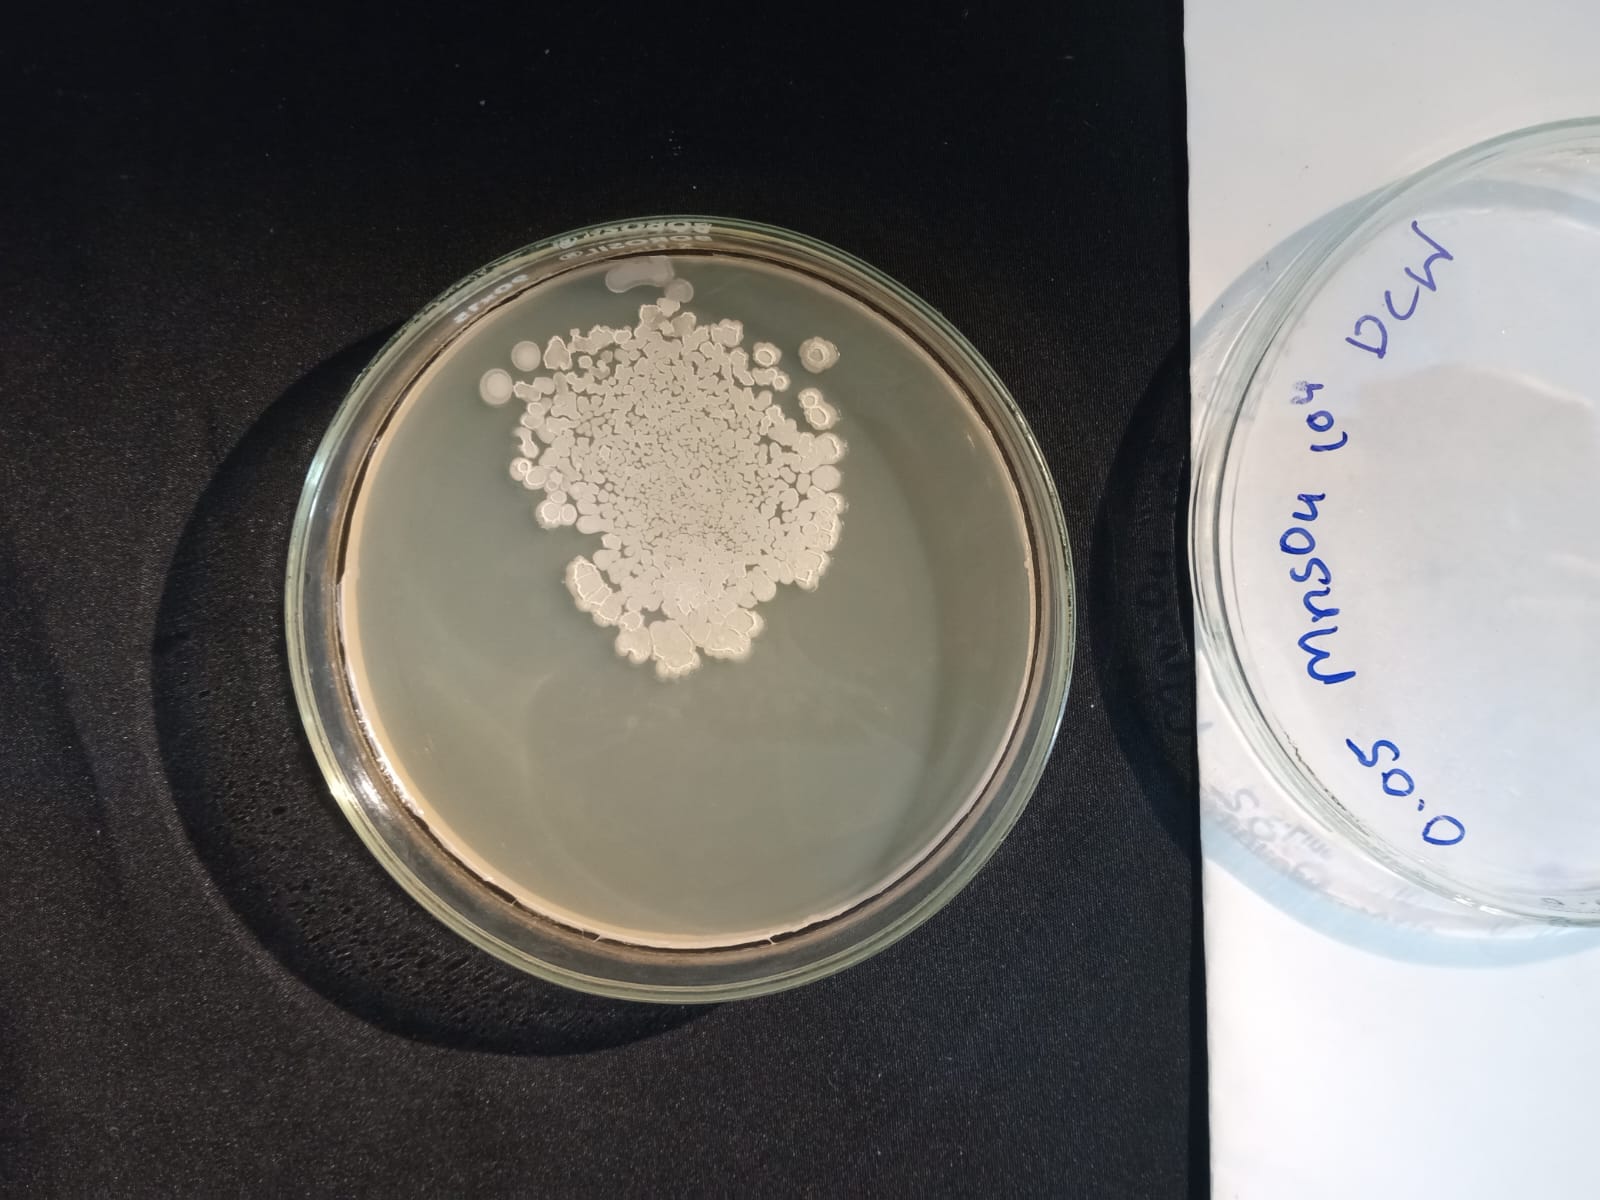** |
| --- | --- |
| **0.05 mM -DCW Dil. 10-2** | **0.05 mM -DCW Dil. 10-4** |
| **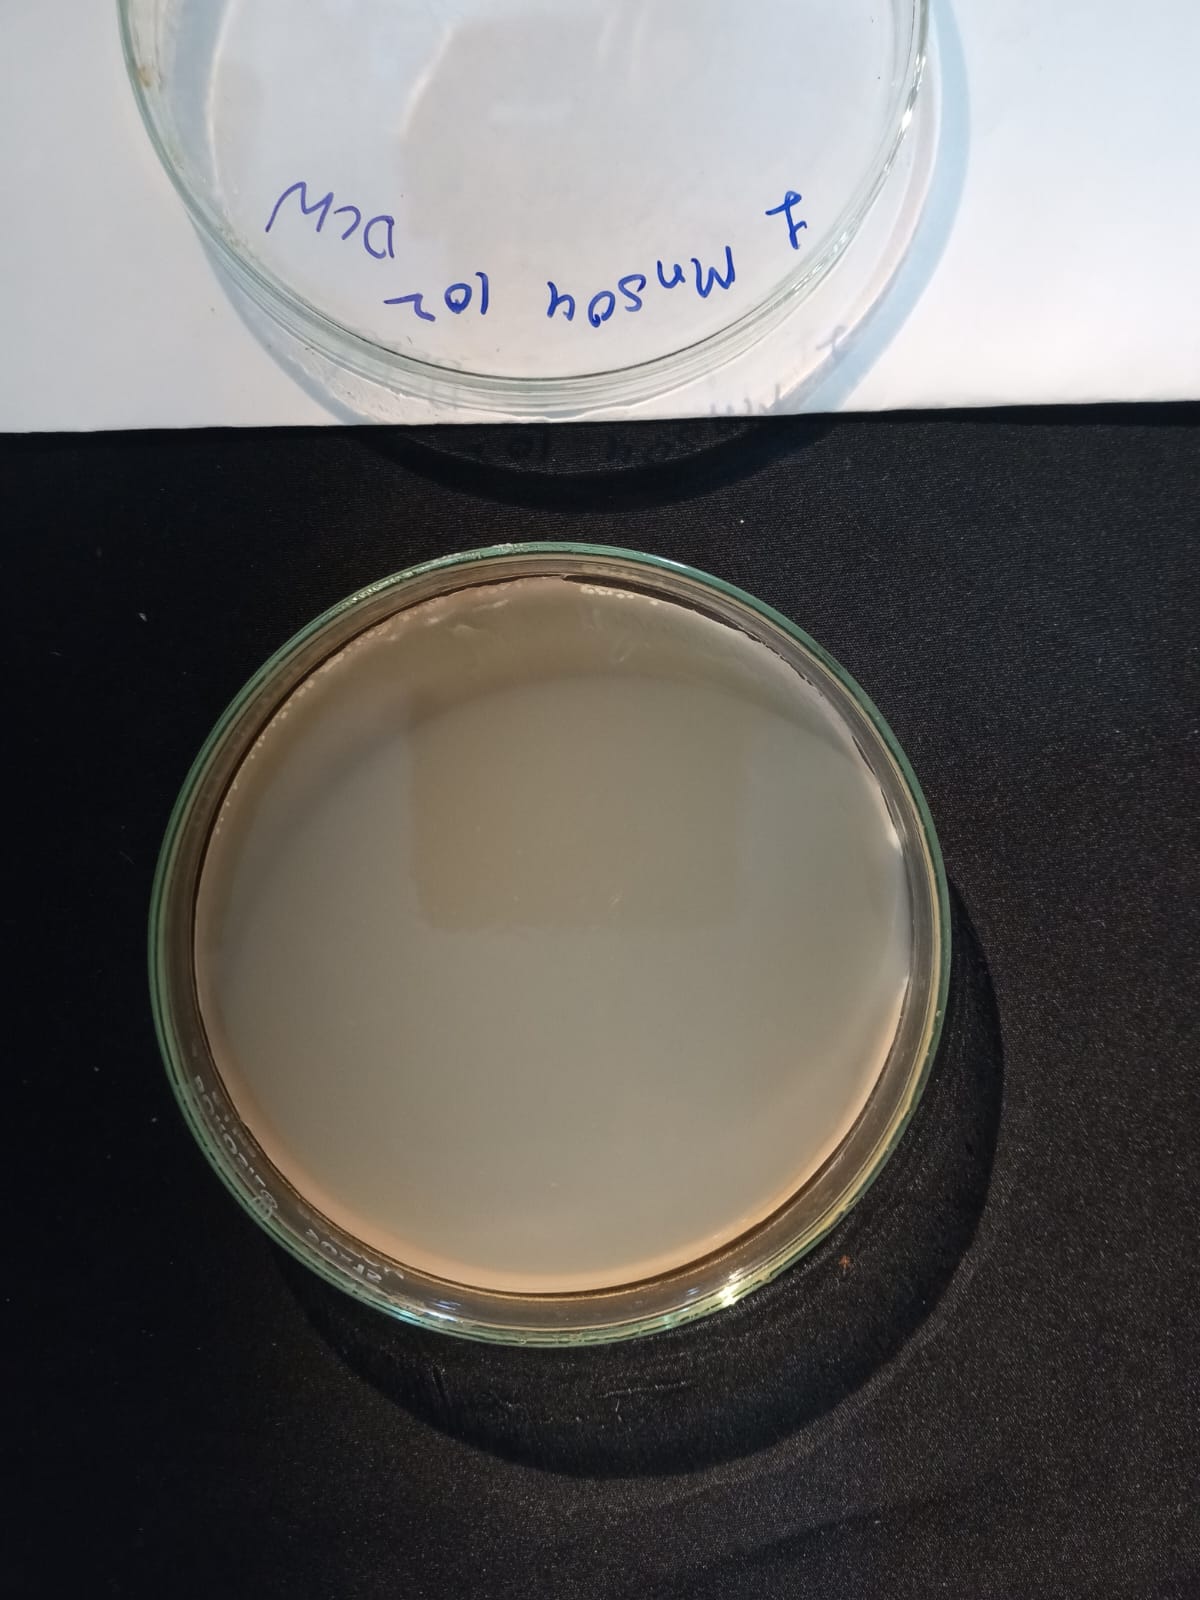** | **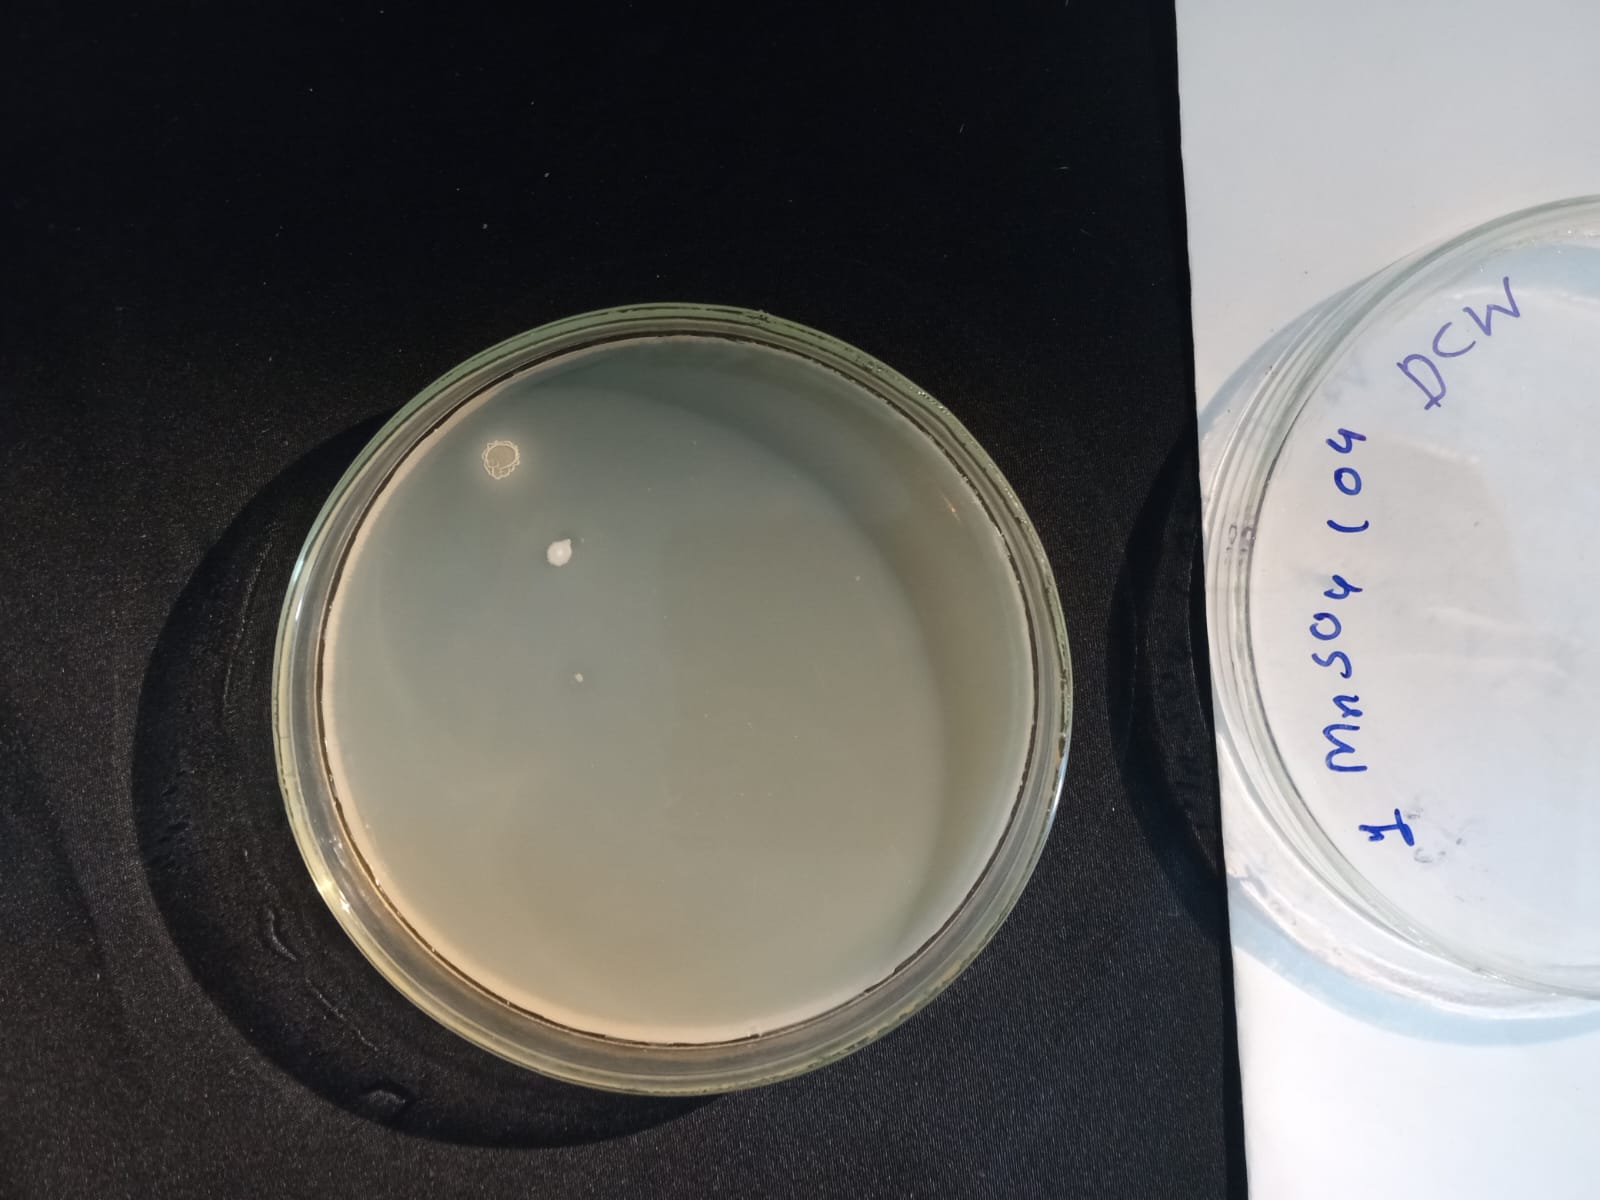** |
| **1 mM -DCW Dil. 10-2** | **1 mM -DCW Dil. 10-4** |
| **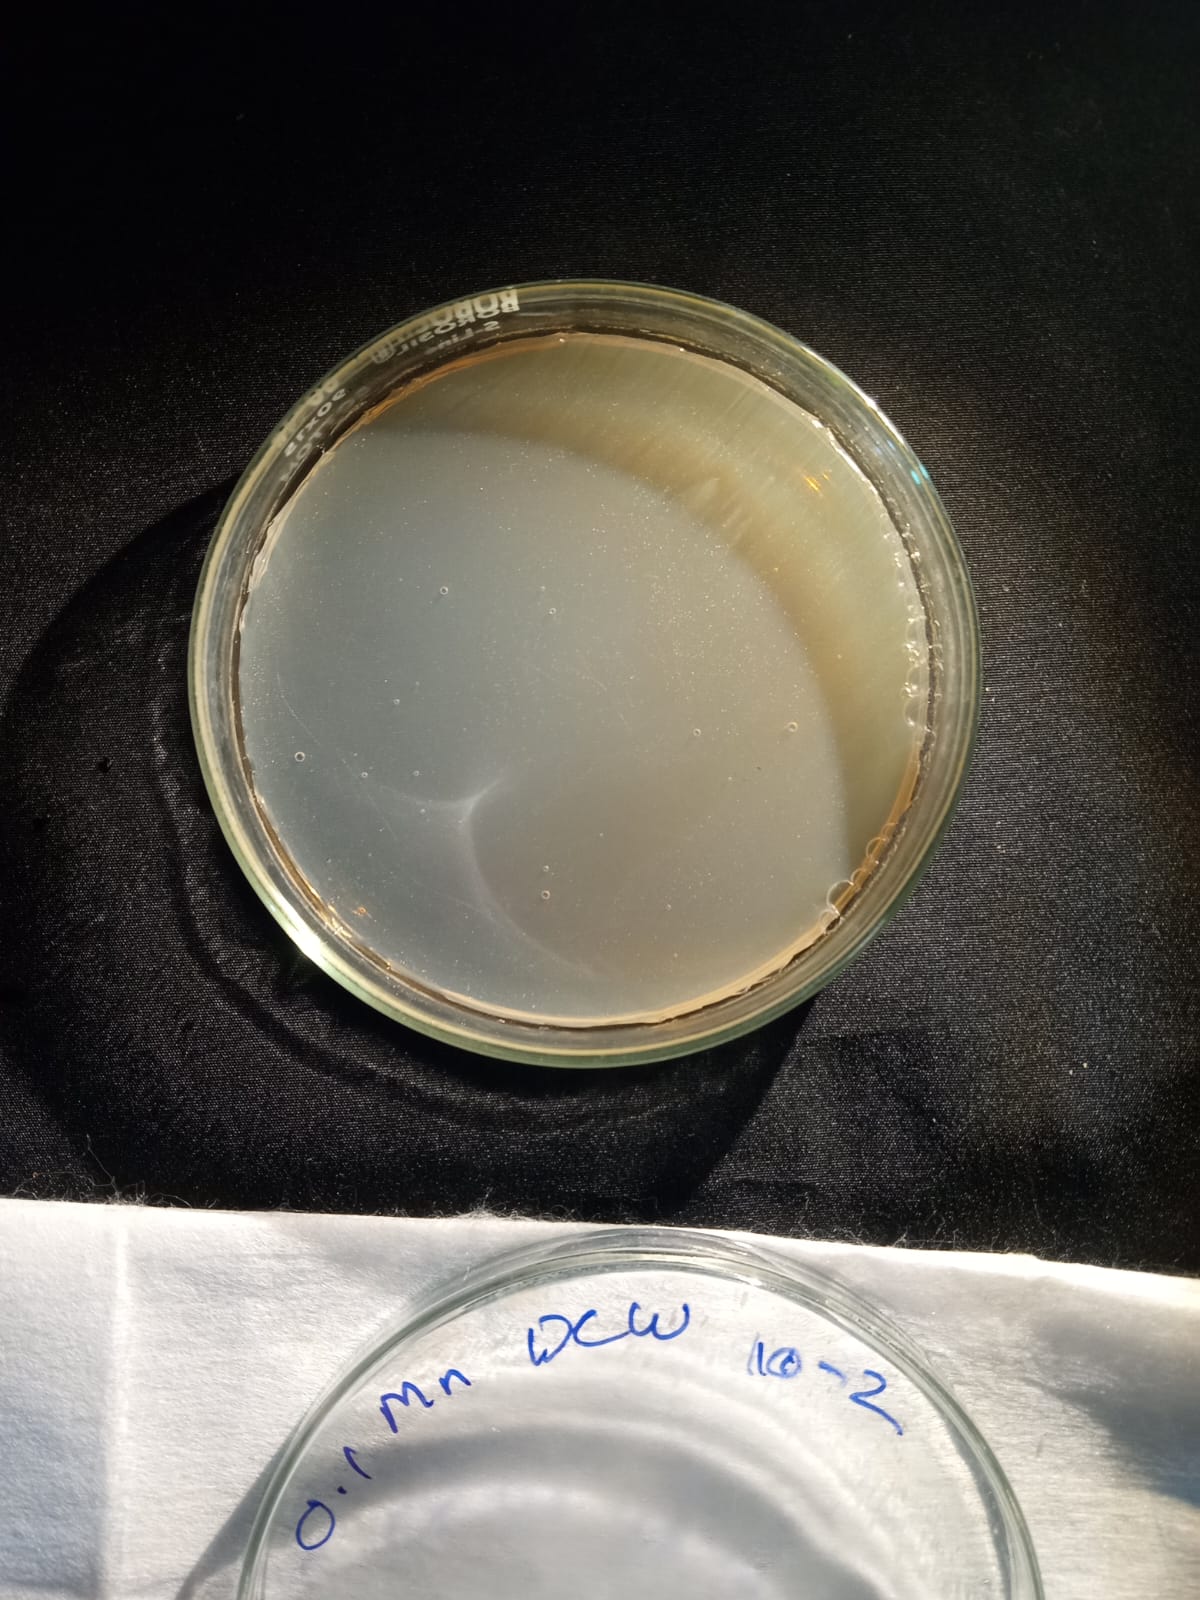** | **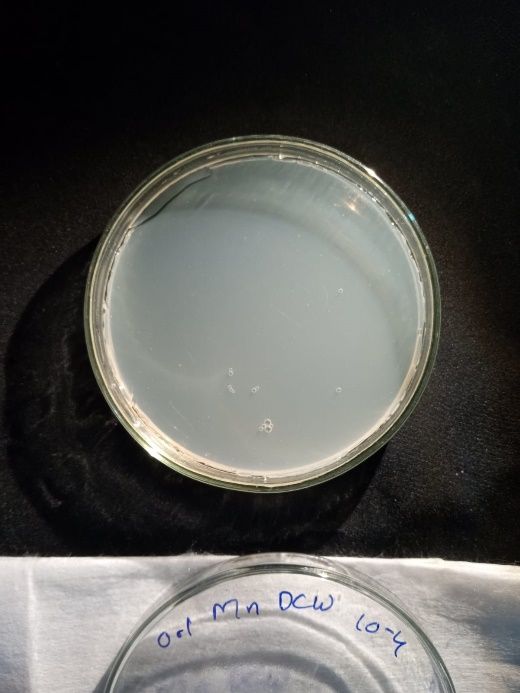** |
| **0.1 mM -DCW Dil. 10-2** | **0.1 mM -DCW Dil. 10-4** |

| 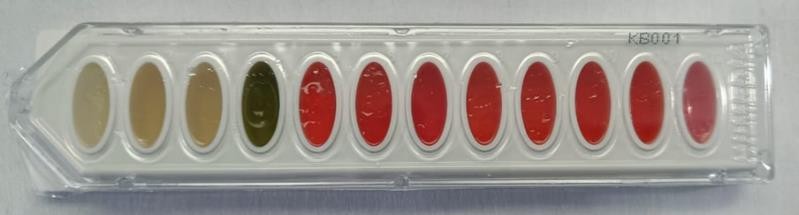 | |
| --- | --- |
| **Uninoculated HiIMViC test kit** | |
|  |  |
| **Mn/1/DCW** | **Mn/1/NPW** |
| Fig : IMViC and sugar fermentation output recorded for Manganese heavy metal tolerant bacteria | |

**Image:** MIC (Minimum Inhibitory Concentration) of MnSO4. H2O (Manganese sulphate monohydrate for selected isolates

**
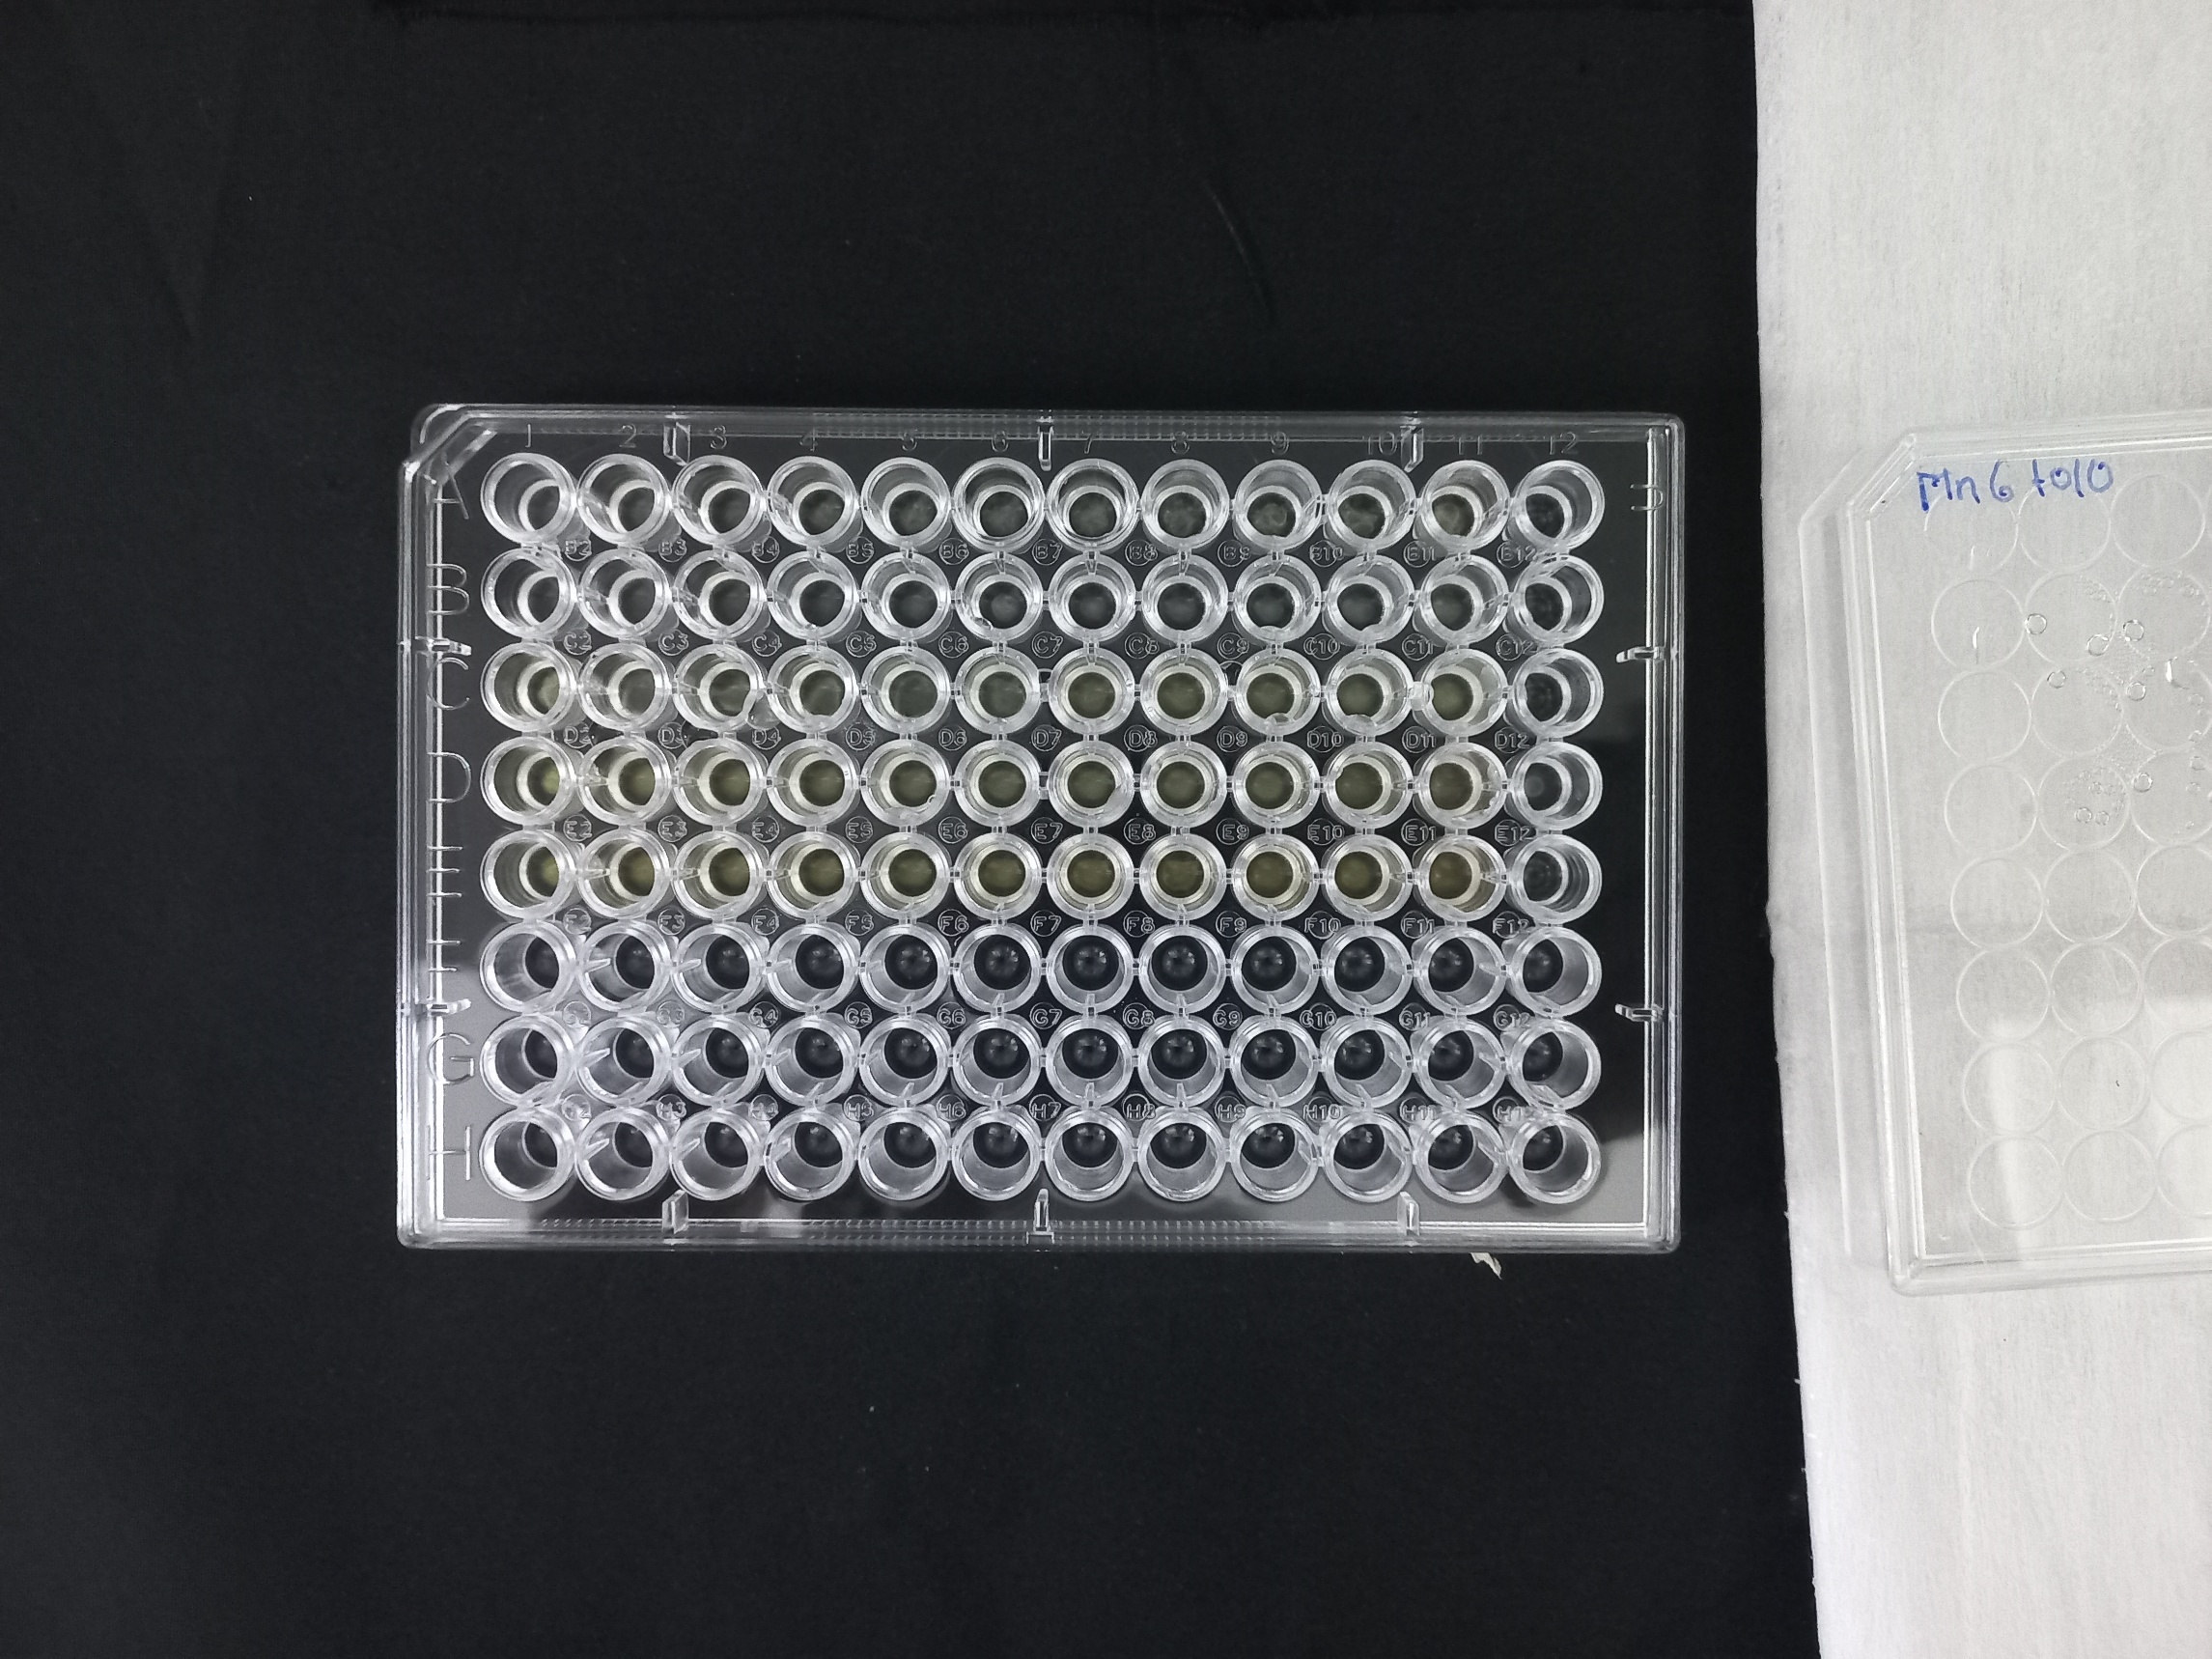
**


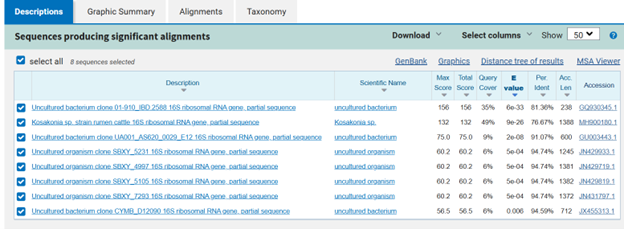


**Fig :** The Sample Mn/1/DCW showed best score homology with *Kosakonia sp.*


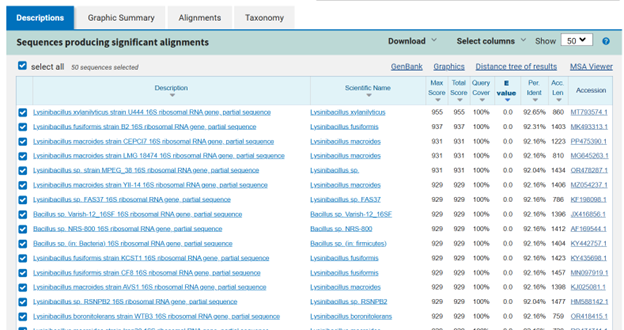


**Fig :** The Sample Mn/1/NPW showed best score homology with *Lysinibacillus xylanilyticus.*
